# Supplementary material
Source: Springer Nature journal article supplement (https://www.springermedizin.de/resource/supplementary/12981_2009_120_MOESM1_ESM.pdf/9603866)
Supplement: MOESM1 [file 9603866]

**434 patients eligible for  
Starting ARV treatment**

**122 patients excluded: did not  
come to start ARV or missing  
follow-up data**

**312 patients completed  
baseline interview and  
pharmacy follow-up**

**34 patients with short follow-  
up duration or incomplete  
pharmacy refill chart**

**278 patients included in  
adherence assessment  
at the end of 6 months  
follow-up**

**178 patients with  
regular pharmacy  
refills during follow-up**

**37 patients still lost to  
follow-up after phone  
call tracing**

**63 patients interrupting  
or discontinuing ARV  
after tracing**

**178 adherent patients,  
“worst case” scenario**

**215 adherent patients, “best case” scenario**
